# Supplementary material for: Global, regional, and national burden of non-communicable diseases attributable to occupational asbestos exposure 1990–2019 and prediction to 2035: worsening or improving?
Source: BMC Public Health. 2024 Mar 18;24:832. doi: 10.1186/s12889-024-18099-4 (PMC10946175; doi:10.1186/s12889-024-18099-4)
Supplement: Supplementary file 3 — Supplementary Material 3 [file 12889_2024_18099_MOESM3_ESM.xlsx]

## Sheet: Sheet1
Table 3. The disease burden attributable to occupational occupational exposure to asbestos at the national levels.
location	Regions	Super GBD regions	SDI	SDI regions	AAPC of ASMR (95% CI)	AAPC of ASDR (95% CI)	ASMR in 2019	Upper limit of ASMR in 2019	Lower limit of ASMR in 2019	ASDR in 2019	Upper limit of ASDR in 2019	Lower limit of ASDR in 2019	ASMR in 1990	Upper limit of ASMR in 1990	Lower limit of ASMR in 1990	ASDR in 1990	Upper limit of ASDR in 1990	Lower limit of ASDR in 1990	Deaths in 2019	Upper limit of Deaths in 2019	Lower limit of Deaths in 2019	DALYs in 2019	Upper limit of DALYs in 2019	Lower limit of DALYs in 2019	Deaths in 1990	Upper limit of Deaths in 1990	Lower limit of Deaths in 1990	DALYs in 1990	Upper limit of DALYs in 1990	Lower limit of DALYs in 1990
Afghanistan	North Africa and Middle East	North Africa and Middle East	0.343	Low SDI	2.14_x000D_ (1.92 , 2.36)	1.79_x000D_ (1.54 , 2.05)	0.38	1.42	0.11	8.58	30.67	2.42	0.21	0.77	0.05	5.22	18.04	1.05	40.16	146.49	10.05	1178.12	3920.77	309.02	13.85	51.6	2.56	384.55	1342.35	71.91
Albania	Central Europe	Central Europe, eastern Europe, and central Asia	0.681	Middle SDI	0.46_x000D_ (-0.34 , 1.27)	0.21_x000D_ (-0.62 , 1.05)	0.9	2.3	0.37	16.89	46.17	6.51	0.78	2.17	0.41	15.77	46.5	7.87	40.19	104.52	16.6	758.51	2075.56	293.27	14.73	42.4	7.57	316.83	959.69	153.67
Algeria	North Africa and Middle East	North Africa and Middle East	0.652	Middle SDI	0.88_x000D_ (0.78 , 0.98)	0.35_x000D_ (0.11 , 0.59)	0.16	0.56	0.05	2.48	8.63	0.8	0.13	0.51	0.04	2.23	8.13	0.63	38.17	133.98	11.27	734.38	2491.52	216.85	10.27	41.01	2.67	245.05	878.95	62.3
American Samoa	Oceania	Southeast Asia, east Asia, and Oceania	0.712	High-middle SDI	-0.63_x000D_ (-1.07 , -0.18)	-0.68_x000D_ (-1.17 , -0.18)	2.66	3.87	1.71	50.34	73.27	31.98	3.18	4.6	2.06	61.13	89.67	39.45	1.1	1.6	0.7	23.06	33.96	14.43	0.58	0.85	0.37	12.97	19.22	8.44
Andorra	Western Europe	High income	0.894	High SDI	-0.93_x000D_ (-1.03 , -0.83)	-1.06_x000D_ (-1.15 , -0.97)	13.44	19.05	8.34	254.32	373.96	152.5	17.6	26.94	10.64	344.91	540.43	197.86	18.91	26.73	11.79	352.25	518.53	210.64	9.43	14.76	5.58	196.38	309.31	111.67
Angola	Central Sub-Saharan Africa	Sub-Saharan Africa	0.47	Low-middle SDI	0.23_x000D_ (0.04 , 0.42)	-0.13_x000D_ (-0.35 , 0.09)	1.06	3.55	0.43	21.24	72.14	8.57	1	3.74	0.4	22.27	83.21	9.06	92.1	312.27	36.89	2246.55	7546.04	903.71	33.25	124.37	13.44	881.44	3279.91	351.33
Antigua and Barbuda	Caribbean	Latin America and Caribbean	0.743	High-middle SDI	-1.65_x000D_ (-3.68 , 0.42)	-2.14_x000D_ (-4.03 , -0.22)	0.36	0.53	0.25	6.06	8.69	4.1	0.6	0.83	0.41	11.62	15.86	8.1	0.33	0.46	0.22	5.9	8.59	3.92	0.34	0.47	0.23	6.19	8.46	4.27
Argentina	Southern Latin America	Latin America and Caribbean	0.708	High-middle SDI	1.14_x000D_ (0.36 , 1.93)	0.85_x000D_ (0.1 , 1.6)	3.39	4.67	2.25	66.08	92.14	43.58	2.52	3.43	1.69	51.84	70.16	34.98	1878.25	2592.36	1249.37	35878.2	49960.5	23644.6	804.95	1096.08	540.97	16934.5	22934.2	11422.3
Armenia	Central Asia	Central Europe, eastern Europe, and central Asia	0.689	Middle SDI	0.25_x000D_ (-0.23 , 0.75)	-0.36_x000D_ (-1.1 , 0.39)	4.51	6.72	2.8	96.01	148.43	57.96	4.19	6.42	2.52	106.91	193.15	61.31	187.82	280.19	115.15	4028.54	6196.63	2385.96	112.33	179.29	66.98	3144.63	5908.57	1785.78
Australia	Australasia	High income	0.839	High SDI	-1.23_x000D_ (-1.43 , -1.03)	-1.81_x000D_ (-2.04 , -1.57)	9.86	11.69	7.96	170.77	206.48	135.37	14.21	17.01	11.17	291.75	352.25	227.46	4449.21	5259.6	3583.17	73973.9	88439.5	59011.6	2875.24	3440.4	2265.91	58704.5	70662	45884.1
Austria	Western Europe	High income	0.849	High SDI	-0.64_x000D_ (-0.84 , -0.44)	-0.87_x000D_ (-1.1 , -0.64)	4.74	6.26	3.3	89.24	119.88	61.77	5.66	7.39	4.02	113.12	148.55	80.07	895.24	1182.28	621.16	15736.9	21077.5	10893.9	714.47	930.96	508.85	13648	17884	9658.53
Azerbaijan	Central Asia	Central Europe, eastern Europe, and central Asia	0.683	Middle SDI	1.4_x000D_ (0.85 , 1.94)	0.87_x000D_ (0.37 , 1.37)	0.6	1.05	0.29	12.72	21.96	5.54	0.41	0.69	0.18	9.73	16.64	4.29	50.15	86.78	21.95	1204.77	2135.58	494.76	19.54	33.43	8.67	500.22	868.4	212.46
Bahamas	Caribbean	Latin America and Caribbean	0.796	High-middle SDI	-1.55_x000D_ (-1.93 , -1.17)	-1.67_x000D_ (-2.83 , -0.51)	1.14	1.75	0.71	23.3	36.27	14.42	1.8	2.52	1.19	39.36	55.01	26.2	4.1	6.35	2.55	92.77	145.13	57.88	2.6	3.64	1.74	61.43	85.45	41.3
Bahrain	North Africa and Middle East	North Africa and Middle East	0.751	High-middle SDI	0.21_x000D_ (-2.95 , 3.48)	-0.35_x000D_ (-3.83 , 3.26)	4.72	7.23	2.16	66.47	104.16	31.82	4.05	6.06	2.35	64.68	98.67	37.89	19.64	31.41	9.43	365.79	594.71	178.19	4.15	6.36	2.42	80.31	125.62	46.62
Bangladesh	South Asia	South Asia	0.483	Low-middle SDI	-1.96_x000D_ (-2.81 , -1.11)	-2.47_x000D_ (-3.27 , -1.66)	0.39	0.91	0.19	7.09	16.79	3.33	0.72	1.19	0.43	14.77	24.84	8.94	454.82	1082.55	213.15	8999.51	21181.4	4157.41	297.89	496.43	179.59	6659.51	11600.5	3976.68
Barbados	Caribbean	Latin America and Caribbean	0.742	High-middle SDI	-0.22_x000D_ (-1.41 , 0.99)	-0.42_x000D_ (-1.21 , 0.38)	0.76	1.09	0.49	13.76	19.93	8.79	0.76	1.02	0.53	14.73	19.48	10.65	3.78	5.45	2.42	67.64	98.38	43.22	2.41	3.29	1.64	43.07	57.66	30.55
Belarus	Eastern Europe	Central Europe, eastern Europe, and central Asia	0.745	High-middle SDI	0.45_x000D_ (-0.99 , 1.92)	0.19_x000D_ (-1.3 , 1.69)	1.33	2.57	0.59	31.95	72	13.11	1.17	2.45	0.54	30.35	74.88	12.3	210.33	396.3	95.03	4869.33	10041.4	2053.38	152.13	318.13	71.7	3935.38	9854.03	1652.05
Belgium	Western Europe	High income	0.851	High SDI	-1.32_x000D_ (-1.69 , -0.94)	-1.55_x000D_ (-1.98 , -1.12)	11.97	14.97	8.91	219.64	281	160.72	17.32	21.49	12.97	339.51	428.33	249.95	2930.14	3637.57	2190.17	49941.9	63297.1	36915.8	2809.94	3480.21	2114.88	53663.9	67286.5	39590.2
Belize	Caribbean	Latin America and Caribbean	0.603	Low-middle SDI	1.05_x000D_ (-0.1 , 2.23)	1.35_x000D_ (0.13 , 2.58)	2.05	2.86	1.38	43.75	61.22	29.89	1.61	2.19	1.1	31.89	43.18	22.29	5.25	7.32	3.57	125.29	174.66	86.56	1.45	1.97	0.99	29.55	39.8	20.79
Benin	Western Sub-Saharan Africa	Sub-Saharan Africa	0.352	Low SDI	-1.13_x000D_ (-1.24 , -1.02)	-1.28_x000D_ (-1.39 , -1.18)	0.4	0.76	0.21	8.22	15.65	4.14	0.56	1.02	0.29	11.92	21.52	6.08	17.09	32.26	8.59	393.19	743.38	193.37	10.62	19.39	5.4	238.26	427.69	120.78
Bermuda	Caribbean	Latin America and Caribbean	0.813	High SDI	-3.18_x000D_ (-3.58 , -2.79)	-3.83_x000D_ (-4.26 , -3.41)	4.12	5.79	2.69	69.91	103.65	45.1	10.7	13.9	7.55	218.14	289.02	153.44	5.75	8.08	3.78	92.29	133.7	59.76	6.45	8.41	4.54	136.42	182.11	95.7
Bhutan	South Asia	South Asia	0.455	Low-middle SDI	2.57_x000D_ (2.37 , 2.77)	1.93_x000D_ (1.74 , 2.12)	0.87	1.44	0.48	14.89	24.33	8.28	0.42	0.72	0.23	8.57	15.32	4.24	4.24	7.01	2.35	78.36	128.65	43.76	0.84	1.48	0.41	20.14	36.87	9.29
Bolivia (Plurinational State of)	Andean Latin America	Latin America and Caribbean	0.566	Low-middle SDI	1.1_x000D_ (0.92 , 1.28)	0.63_x000D_ (0.41 , 0.85)	2.3	3.82	1.19	39.29	66.1	20.23	1.68	2.67	0.87	32.54	52.82	16.76	175.98	296.03	90.11	3276.69	5549.38	1678.89	46.71	75.19	23.71	1004.94	1663.14	518.28
Bosnia and Herzegovina	Central Europe	Central Europe, eastern Europe, and central Asia	0.718	High-middle SDI	-0.97_x000D_ (-1.99 , 0.07)	-1.24_x000D_ (-2.33 , -0.14)	2.07	3.57	1.02	43.13	74.99	20.59	2.61	3.86	1.55	58.62	87.23	35.05	129.97	224.97	63.23	2736.05	4786.23	1292.78	102.28	152.43	61.37	2451.56	3695.71	1462.96
Botswana	Southern Sub-Saharan Africa	Sub-Saharan Africa	0.634	Middle SDI	0.01_x000D_ (-0.46 , 0.49)	-0.17_x000D_ (-0.74 , 0.4)	5.84	8.43	3.47	117.51	175.45	69.2	5.86	8.31	3.57	125.29	182.91	72.93	66.21	98.72	38.75	1504.73	2310.4	860.72	30.52	44.46	17.91	714.81	1060.54	407.31
Brazil	Tropical Latin America	Latin America and Caribbean	0.64	Middle SDI	-0.24_x000D_ (-0.45 , -0.02)	-0.53_x000D_ (-1.05 , 0)	1.9	2.39	1.44	35.75	44.63	27.96	2.05	2.6	1.56	41.39	52.46	31.66	4293.53	5383.67	3281.46	84319.9	105101	66656.7	1564.67	1984.86	1189.89	37044.8	47389.1	28226.3
Brunei Darussalam	High-income Asia Pacific	High income	0.823	High SDI	0.01_x000D_ (-0.58 , 0.6)	-0.43_x000D_ (-1.2 , 0.34)	5.38	7.63	3.66	82.25	115.34	57.12	5.34	8.26	3.22	92.12	143.3	54.38	9.31	13.11	6.42	177.22	253.12	120.57	3.63	5.7	2.11	72.37	113.97	42.47
Bulgaria	Central Europe	Central Europe, eastern Europe, and central Asia	0.764	High-middle SDI	3.11_x000D_ (2.68 , 3.54)	3.01_x000D_ (2.56 , 3.45)	0.76	1.27	0.4	18.52	31.31	9.57	0.37	0.53	0.25	8.96	12.83	5.9	112.06	185.28	60.9	2564.29	4279.05	1332.34	49.16	69.8	32.47	1187.01	1708.9	771.81
Burkina Faso	Western Sub-Saharan Africa	Sub-Saharan Africa	0.257	Low SDI	-0.95_x000D_ (-1.35 , -0.55)	-1.07_x000D_ (-1.44 , -0.7)	0.31	0.69	0.15	6.59	14.32	3.22	0.42	0.87	0.2	9.09	18.73	4.21	25.1	54.33	12.21	610.53	1311.83	284.84	16.78	35.86	7.9	405.29	818.4	182.72
Burundi	Eastern Sub-Saharan Africa	Sub-Saharan Africa	0.284	Low SDI	-1.15_x000D_ (-1.43 , -0.86)	-1.4_x000D_ (-1.7 , -1.11)	0.77	2.57	0.29	15.91	51.61	6.07	1.08	2.74	0.49	23.9	59.48	11.05	28.81	93.9	10.83	709.79	2244.2	260.26	23.44	59.42	10.59	569.37	1397.67	259.51
Cabo Verde	Western Sub-Saharan Africa	Sub-Saharan Africa	0.525	Low-middle SDI	4.24_x000D_ (2.6 , 5.91)	3.98_x000D_ (2.26 , 5.73)	0.36	0.61	0.2	6.76	11.52	3.8	0.12	0.19	0.07	2.63	4.27	1.46	1.38	2.32	0.77	26.44	44.8	15.18	0.3	0.47	0.16	6.13	9.7	3.46
Cambodia	Southeast Asia	Southeast Asia, east Asia, and Oceania	0.469	Low-middle SDI	1.99_x000D_ (1.83 , 2.15)	1.54_x000D_ (1.35 , 1.73)	1.69	2.62	0.98	32.23	50.32	17.96	0.96	1.6	0.51	20.74	34.87	10.69	170.12	264.27	96.03	3727.67	5995.1	2027.55	37.29	62.27	19.34	948.52	1638.73	475.37
Cameroon	Western Sub-Saharan Africa	Sub-Saharan Africa	0.49	Low-middle SDI	0.04_x000D_ (-0.17 , 0.24)	-0.1_x000D_ (-0.36 , 0.16)	0.75	1.31	0.4	15.4	27.22	7.97	0.74	1.19	0.42	15.86	25.27	8.75	75.99	133.67	39.26	1765.5	3146.88	902.41	29.41	46.94	16.27	704.98	1122.8	382.94
Canada	High-income North America	High income	0.873	High SDI	-1.16_x000D_ (-1.45 , -0.88)	-1.71_x000D_ (-1.95 , -1.48)	8.7	10.91	6.5	145.79	185.68	106.44	12.32	15.25	9.15	243.07	303.91	177.93	6430.64	8048.32	4797.58	104955	133122	76876.1	4110.03	5087.33	3050.59	80578.7	100487	59001.7
Central African Republic	Central Sub-Saharan Africa	Sub-Saharan Africa	0.274	Low SDI	-0.7_x000D_ (-0.84 , -0.57)	-0.85_x000D_ (-1.02 , -0.67)	1.18	3.04	0.5	26.91	69.46	11.37	1.44	4.05	0.63	33.88	95.7	14.86	21.89	56.83	9.19	594.97	1540.4	244.78	15.41	43.5	6.7	416.96	1150.52	182.85
Chad	Western Sub-Saharan Africa	Sub-Saharan Africa	0.238	Low SDI	0.31_x000D_ (0.16 , 0.47)	0.08_x000D_ (-0.08 , 0.24)	0.34	0.82	0.15	7.15	17.14	3.1	0.32	0.79	0.12	7.09	17.27	2.64	16.79	40.62	7.17	394.56	929.18	168.41	8.87	21.93	3.46	208.08	492.88	75.65
Chile	Southern Latin America	Latin America and Caribbean	0.759	High-middle SDI	-1.09_x000D_ (-1.86 , -0.31)	-1.55_x000D_ (-2.33 , -0.76)	1.77	2.44	1.19	31.31	43.11	20.94	2.51	3.32	1.76	49.99	66.19	34.8	428.42	590.41	286.9	7575.98	10461.2	5062.51	238.58	316.84	166.16	4975.03	6605.56	3463.11
China	East Asia	Southeast Asia, east Asia, and Oceania	0.686	Middle SDI	1.58_x000D_ (1.24 , 1.92)	1.2_x000D_ (0.95 , 1.45)	1.47	2.13	0.98	24.55	35.87	16.26	0.92	1.38	0.62	16.99	25.4	11.32	26246.2	38410.9	17270.3	478326	703850	313948	6237.03	9440.49	4162.38	135618	204942	88058.5
Colombia	Central Latin America	Latin America and Caribbean	0.633	Middle SDI	-0.86_x000D_ (-2.45 , 0.76)	-1.39_x000D_ (-2.9 , 0.15)	0.7	1.14	0.4	13.73	22.63	7.79	0.85	1.12	0.62	17.66	23.29	13.05	368.62	599.49	211.33	7187.43	11833.5	4089.27	134.78	179.07	98.77	3044.98	3983.44	2256.68
Comoros	Eastern Sub-Saharan Africa	Sub-Saharan Africa	0.455	Low-middle SDI	0.35_x000D_ (0.06 , 0.65)	0.18_x000D_ (-0.4 , 0.77)	0.85	2.43	0.34	16.87	49.28	6.53	0.78	2.62	0.29	16.29	54.76	5.64	3.77	10.86	1.5	80.8	235.46	30.99	1.59	5.4	0.58	36.3	122.49	11.96
Congo	Central Sub-Saharan Africa	Sub-Saharan Africa	0.568	Low-middle SDI	-1.07_x000D_ (-1.37 , -0.77)	-1.45_x000D_ (-1.78 , -1.12)	1.48	4.1	0.66	29.23	81.53	13.02	2.07	4.93	1.04	45.77	109.98	22.65	30.5	85.91	13.5	721.07	2042.74	312.77	19.83	47.44	9.68	497.38	1196.75	243.26
Cook Islands	Oceania	Southeast Asia, east Asia, and Oceania	0.764	High-middle SDI	-0.81_x000D_ (-1.12 , -0.5)	-1.03_x000D_ (-1.33 , -0.72)	1.69	3.3	0.82	29.78	61.95	13.75	2.13	3.88	1.13	40.29	75.2	20.98	0.39	0.79	0.19	7.28	15.09	3.33	0.23	0.43	0.12	4.85	9.05	2.51
Costa Rica	Central Latin America	Latin America and Caribbean	0.68	Middle SDI	-0.75_x000D_ (-3.18 , 1.74)	-0.95_x000D_ (-3.66 , 1.83)	0.43	0.69	0.24	6.71	10.83	3.8	0.56	0.77	0.39	9.21	12.4	6.48	21.85	34.81	12.34	338.64	546.71	190.61	8.93	12.15	6.25	152.45	204.46	107.03
Croatia	Western Sub-Saharan Africa	Sub-Saharan Africa	0.408	Low SDI	3.2_x000D_ (2.51 , 3.88)	2.87_x000D_ (2.17 , 3.58)	8.67	12.84	5.28	181.7	277.04	108.87	3.62	5.04	2.37	81.7	115.12	53.36	804.8	1186.15	494.3	16110.6	24355.8	9632.71	241.34	336.88	156.87	5583.57	7900.67	3632.64
Cuba	Central Europe	Central Europe, eastern Europe, and central Asia	0.794	High-middle SDI	-0.52_x000D_ (-1.67 , 0.65)	-0.39_x000D_ (-1.49 , 0.73)	1.07	1.72	0.61	19.66	32.09	11.3	1.26	1.81	0.82	22.49	31.7	15.03	212.54	341.23	123.31	3826.36	6220.78	2195.52	128.71	184.97	83.57	2325.79	3292.21	1554.9
Cyprus	Caribbean	Latin America and Caribbean	0.668	Middle SDI	-0.7_x000D_ (-1.23 , -0.16)	-1_x000D_ (-1.7 , -0.3)	6.15	8.2	4.32	104.38	139.43	73.27	7.39	9.51	5.35	134.74	175.89	96.82	125.26	167.81	87.8	2144.26	2874.25	1503.76	59.15	76.46	41.94	1144.93	1497.8	810.65
Czechia	Western Europe	High income	0.841	High SDI	-1.38_x000D_ (-2.76 , 0.02)	-1.84_x000D_ (-3.29 , -0.38)	2.51	3.91	1.51	48.95	78.21	28.93	3.9	5.43	2.55	86.57	120.43	56.19	570.93	880.6	338.43	10751.6	17043.8	6366.27	554.5	773.02	360.18	12208.8	17068.6	7897.16
C么te d'Ivoire	Central Europe	Central Europe, eastern Europe, and central Asia	0.828	High SDI	-0.85_x000D_ (-1.06 , -0.65)	-0.99_x000D_ (-1.39 , -0.58)	0.55	0.97	0.29	11.15	20.23	5.79	0.71	1.26	0.37	14.9	26.65	7.61	47.09	85.68	24.38	1111.63	2068.52	545.17	23.09	41.63	11.69	574.47	1026.65	292.36
Democratic People's Republic of Korea	East Asia	Southeast Asia, east Asia, and Oceania	0.558	Low-middle SDI	1.48_x000D_ (1.39 , 1.57)	1.59_x000D_ (1.5 , 1.68)	1.13	1.71	0.66	25.6	39.46	14.48	0.74	1.24	0.42	16.26	28.06	8.73	359.06	547.95	209.61	8490.62	13235.1	4668.86	105.77	180.79	57.09	2690.8	4827.84	1376.15
Democratic Republic of the Congo	Central Sub-Saharan Africa	Sub-Saharan Africa	0.382	Low SDI	-0.62_x000D_ (-0.83 , -0.41)	-0.59_x000D_ (-0.71 , -0.48)	0.91	2.83	0.27	18.77	56.97	5.99	1.09	3.78	0.35	22.34	73.67	7.42	267.53	817.71	83.85	6517.25	19517.6	2117.04	139.76	465	46.02	3480.19	11234.6	1139.12
Denmark	Western Europe	High income	0.89	High SDI	-0.69_x000D_ (-0.95 , -0.44)	-1.18_x000D_ (-1.34 , -1.01)	10.4	13.15	7.82	187.98	242.22	140.14	12.73	16	9.39	265.95	338.69	193.98	1307.12	1638.38	991.63	22637.2	28970.9	16906.6	1080.73	1350.15	797.22	21427.8	27123.4	15702.9
Djibouti	Eastern Sub-Saharan Africa	Sub-Saharan Africa	0.459	Low-middle SDI	1.15_x000D_ (0.89 , 1.41)	0.89_x000D_ (0.53 , 1.24)	1.09	3.75	0.39	20.9	72.27	7.34	0.77	2.94	0.27	16.21	62.18	5.54	4.85	16.89	1.68	113.82	386.23	37.97	0.85	3.29	0.28	22.43	85.8	7.2
Dominica	Caribbean	Latin America and Caribbean	0.729	High-middle SDI	0.82_x000D_ (0.29 , 1.35)	0.86_x000D_ (0.3 , 1.41)	2.47	3.72	1.5	46.34	71.39	28.16	1.95	2.79	1.28	37.25	53.96	24.14	2.29	3.46	1.4	42.36	65.45	25.69	1.5	2.16	0.98	27.16	39.43	17.48
Dominican Republic	Caribbean	Latin America and Caribbean	0.592	Low-middle SDI	2.18_x000D_ (0.78 , 3.6)	2.13_x000D_ (0.68 , 3.61)	0.53	0.91	0.28	9.47	16.58	4.86	0.29	0.44	0.17	5.13	7.97	3.02	46.36	78.68	23.89	864.75	1532.87	435.15	9.2	14.15	5.35	186.1	288.02	106.05
Ecuador	Andean Latin America	Latin America and Caribbean	0.64	Middle SDI	1.77_x000D_ (1.25 , 2.29)	1_x000D_ (0.44 , 1.56)	0.84	1.27	0.51	12.08	18.9	7.34	0.48	0.7	0.34	8.36	12.1	6.14	108.12	166.27	65.24	1711.81	2707.77	1033.79	21.96	31.76	15.76	425.15	614.2	314.58
Egypt	North Africa and Middle East	North Africa and Middle East	0.658	Middle SDI	3.01_x000D_ (2.1 , 3.93)	2.72_x000D_ (2.02 , 3.42)	0.17	0.57	0.05	3.4	11.67	0.83	0.08	0.19	0.02	1.62	4.15	0.47	88.15	307.08	20.47	2113.01	7397.17	464.55	18.87	49.03	5.51	482.01	1244.58	128.76
El Salvador	Central Latin America	Latin America and Caribbean	0.573	Low-middle SDI	2.38_x000D_ (0.81 , 3.97)	1.95_x000D_ (0.19 , 3.74)	0.13	0.22	0.06	2.39	4.42	1.1	0.07	0.1	0.04	1.35	2.15	0.81	7.72	13.3	3.79	140.92	258.54	65.35	1.82	2.81	1.14	39.13	62.22	23.25
Equatorial Guinea	Central Sub-Saharan Africa	Sub-Saharan Africa	0.685	Middle SDI	0.37_x000D_ (-0.04 , 0.78)	-0.42_x000D_ (-0.86 , 0.02)	1.3	3.89	0.52	23.62	75.15	8.78	1.17	3.2	0.45	26.75	72.51	10.44	4.83	15.08	1.86	102.41	335.72	35.37	2.12	5.78	0.82	54.64	147.87	21.02
Eritrea	Eastern Sub-Saharan Africa	Sub-Saharan Africa	0.396	Low SDI	0.71_x000D_ (0.42 , 1.01)	0.32_x000D_ (0.08 , 0.56)	1.05	2.3	0.43	22.75	50.24	9.57	0.86	1.96	0.32	20.73	46.35	7.87	23.14	51.27	9.61	609.13	1334.3	250.16	7.64	17.18	2.83	222.36	487.87	82.32
Estonia	Eastern Europe	Central Europe, eastern Europe, and central Asia	0.835	High SDI	1.48_x000D_ (-2.55 , 5.68)	0.92_x000D_ (-3.15 , 5.15)	1.82	2.97	1.03	33.93	57.92	18.73	1.27	1.78	0.84	27.45	38.69	18.15	52.85	85.04	30.15	908.88	1527.96	503.34	26.33	36.96	17.4	576.05	815.2	381.4
Eswatini	Southern Sub-Saharan Africa	Sub-Saharan Africa	0.577	Low-middle SDI	-0.12_x000D_ (-0.31 , 0.08)	-0.1_x000D_ (-0.32 , 0.12)	6.02	9.3	3.41	134.53	216.17	73.46	6.17	9.13	3.93	137.13	208.69	85.45	31.75	50.45	17.4	780.57	1275.84	418.27	16.14	24.26	10.14	391.94	603.19	240.03
Ethiopia	Eastern Sub-Saharan Africa	Sub-Saharan Africa	0.343	Low SDI	-1.04_x000D_ (-1.16 , -0.92)	-1.64_x000D_ (-1.8 , -1.47)	0.72	2.52	0.25	13.82	48.59	4.94	0.97	2.64	0.38	22.33	58.1	8.99	251.94	878.57	89.38	5461.81	18771.2	1934.74	174.74	463.34	68.93	4662.21	11784.4	1867.16
Fiji	Oceania	Southeast Asia, east Asia, and Oceania	0.664	Middle SDI	1.87_x000D_ (1.28 , 2.46)	1.91_x000D_ (1.22 , 2.61)	1.18	1.83	0.72	24.08	37.25	14.66	0.71	1.15	0.44	14.27	23.26	8.78	7.6	11.88	4.57	177.81	284.9	107	1.99	3.25	1.21	47.38	77.53	29.04
Finland	Western Europe	High income	0.856	High SDI	-1.18_x000D_ (-1.4 , -0.97)	-1.66_x000D_ (-1.93 , -1.4)	6.51	8.41	4.75	114.93	150.12	82.82	9.28	11.67	6.93	187.07	237.46	138.53	892.13	1149.67	652.2	14936.2	19425.6	10816.6	691.38	867.42	516.65	13631.5	17333.5	10184.7
France	Western Europe	High income	0.834	High SDI	-0.01_x000D_ (-0.31 , 0.29)	-0.07_x000D_ (-0.44 , 0.3)	10.59	13.35	7.78	214.86	277.87	154.93	10.53	13.15	7.82	219.21	278.73	160.56	14963.1	18748.7	11170.4	275014	351169	200633	8995.68	11148.2	6752.59	178350	225433	130921
Gabon	Central Sub-Saharan Africa	Sub-Saharan Africa	0.656	Middle SDI	-0.06_x000D_ (-0.33 , 0.21)	-0.35_x000D_ (-0.68 , -0.03)	1.78	4.39	0.86	35	90.84	16.08	1.84	4.17	0.91	39.51	89.21	19.34	15.7	40.04	7.33	348.59	931.52	155.18	9.64	22.2	4.63	224.71	511.56	105.73
Gambia	Western Sub-Saharan Africa	Sub-Saharan Africa	0.399	Low SDI	0.38_x000D_ (-0.85 , 1.63)	0.35_x000D_ (-1.14 , 1.87)	0.35	0.65	0.18	7.48	14.13	3.81	0.32	0.66	0.15	6.93	14.59	3.09	3.08	5.71	1.62	71.67	136.6	35.55	1.03	2.15	0.47	25.15	51.6	10.62
Georgia	Central Asia	Central Europe, eastern Europe, and central Asia	0.702	High-middle SDI	9.95_x000D_ (6.92 , 13.06)	10.29_x000D_ (7.39 , 13.26)	3.68	5.71	2.12	91.39	143.04	52.11	0.23	0.33	0.14	5.34	8.13	3.01	218.91	339.96	126.94	5275.04	8251.26	3004.32	14.12	21	8.39	346.99	529.16	192.22
Germany	Western Europe	High income	0.898	High SDI	-0.36_x000D_ (-0.67 , -0.05)	-0.83_x000D_ (-1.08 , -0.58)	7.42	9.58	5.39	131.72	175.1	93.68	8.15	10.27	5.99	166.52	213.63	120.55	15775	20270.2	11648.8	257172	336485	185353	10763.9	13530.9	7931.74	211549	269681	154585
Ghana	Western Sub-Saharan Africa	Sub-Saharan Africa	0.557	Low-middle SDI	-1.82_x000D_ (-2.13 , -1.51)	-2.02_x000D_ (-2.39 , -1.64)	0.44	0.68	0.28	9	14.15	5.59	0.74	1.13	0.44	16.26	24.68	9.4	60	93.86	37.39	1465.52	2351.87	894.14	41.77	64.09	23.9	1032.19	1578.46	587.05
Greece	Western Europe	High income	0.794	High-middle SDI	-0.63_x000D_ (-0.87 , -0.39)	-0.57_x000D_ (-0.87 , -0.27)	4.34	6.41	2.69	81.07	121.64	49.76	5.01	7.06	3.21	92.57	132.14	58.13	1126.78	1653.61	700.19	18666.6	27638.2	11565.6	790.59	1116.84	501.87	14612.1	20717.5	9235
Greenland	High-income North America	High income	0.761	High-middle SDI	1.28_x000D_ (0.37 , 2.19)	1.06_x000D_ (0.05 , 2.08)	17.71	23.98	11.85	318.62	442.25	206.57	12.49	18.41	8.14	242.3	353.91	155.19	10.57	14.59	6.93	207.39	296.38	131.26	3.34	4.87	2.13	73.08	107.5	45.85
Grenada	Caribbean	Latin America and Caribbean	0.669	Middle SDI	-2.97_x000D_ (-4.77 , -1.13)	-2.72_x000D_ (-4.08 , -1.34)	1.03	1.43	0.73	21.66	30.25	15.35	2.5	3.34	1.71	49.15	65.34	34.21	1.1	1.52	0.78	25.01	35.05	17.62	1.98	2.63	1.34	35.98	47.73	25.05
Guam	Oceania	Southeast Asia, east Asia, and Oceania	0.813	High SDI	-1.84_x000D_ (-3.6 , -0.05)	-1.35_x000D_ (-3.21 , 0.54)	1.78	2.9	1.04	35.17	57.91	19.66	2.87	4.58	1.72	50.06	82.75	28.8	3.42	5.54	1.99	67.97	112.14	37.87	1.57	2.65	0.87	35.28	60.24	19.52
Guatemala	Central Latin America	Latin America and Caribbean	0.526	Low-middle SDI	-0.17_x000D_ (-1.24 , 0.91)	-0.43_x000D_ (-1.74 , 0.9)	0.23	0.36	0.13	3.96	6.42	2.19	0.24	0.33	0.16	4.57	6.46	3.08	22.53	36.16	12.81	426.7	708.41	234.31	6.83	9.71	4.63	169.6	240.39	111.87
Guinea	Western Sub-Saharan Africa	Sub-Saharan Africa	0.325	Low SDI	0.6_x000D_ (0.41 , 0.79)	0.48_x000D_ (0.3 , 0.66)	0.42	0.77	0.2	9.1	17.1	4.27	0.35	0.81	0.16	8.02	17.79	3.31	21.07	39.18	10.01	503.56	958.11	228.14	11.33	25.9	4.87	275.98	597.51	111.36
Guinea-Bissau	Western Sub-Saharan Africa	Sub-Saharan Africa	0.355	Low SDI	-1.45_x000D_ (-1.58 , -1.32)	-1.51_x000D_ (-1.62 , -1.4)	0.71	1.3	0.35	15.98	29.41	7.73	1.09	1.99	0.56	24.94	46.26	12.52	4.56	8.44	2.2	117.81	217.83	55.39	4.19	7.77	2.09	104.08	187.71	51.59
Guyana	Caribbean	Latin America and Caribbean	0.618	Middle SDI	0.36_x000D_ (-0.15 , 0.87)	0.42_x000D_ (-0.13 , 0.97)	0.97	1.47	0.62	23.61	36.45	14.86	0.86	1.14	0.63	20.99	27.53	15.32	5.82	8.92	3.69	160.11	252.61	99.38	3.15	4.18	2.29	88.27	114.96	63.81
Haiti	Caribbean	Latin America and Caribbean	0.432	Low SDI	0.09_x000D_ (-0.07 , 0.24)	-0.22_x000D_ (-0.39 , -0.05)	1.52	2.87	0.64	30.81	57.58	13	1.49	2.6	0.66	33.25	58.46	14.6	89.47	166.35	37.71	2146.96	4136.88	899.44	43.44	76.41	18.92	1121.02	1987.52	491.09
Honduras	Central Latin America	Latin America and Caribbean	0.496	Low-middle SDI	4.01_x000D_ (3.42 , 4.61)	3.71_x000D_ (2.96 , 4.47)	1.9	3.15	1.08	36.97	63.34	20.54	0.63	1.07	0.32	13.48	22.97	6.88	103.85	174.68	58.16	2183	3785.34	1208.53	11.91	20.11	6.15	282.95	483.73	143.42
Hungary	Central Europe	Central Europe, eastern Europe, and central Asia	0.791	High-middle SDI	1.06_x000D_ (0.19 , 1.93)	0.66_x000D_ (0.1 , 1.23)	2.74	4.28	1.62	60.59	96.13	35.08	2.26	3.1	1.53	51.54	71.02	34.84	551.04	850.93	326.4	11644.3	18130.5	6736.61	347.68	477.5	234.93	7823.38	10806.9	5269.59
Iceland	Western Europe	High income	0.869	High SDI	-0.15_x000D_ (-0.79 , 0.49)	-0.3_x000D_ (-1.04 , 0.46)	6.09	7.85	4.44	110.2	144.98	79.35	6.62	8.33	4.98	124.44	158.25	92.41	35.24	45.38	25.67	613.33	804.78	443.67	19.74	24.84	14.88	362.23	460.38	268.53
India	South Asia	South Asia	0.566	Low-middle SDI	1.37_x000D_ (0.46 , 2.29)	1.32_x000D_ (0.55 , 2.1)	0.8	1.13	0.56	15.25	21.26	10.74	0.56	0.85	0.37	10.85	16.94	7.13	8069.9	11320.4	5679.19	168670	236600	117465	1929.3	3010.32	1270.41	45599.4	73075.3	29284.4
Indonesia	Southeast Asia	Southeast Asia, east Asia, and Oceania	0.66	Middle SDI	4.05_x000D_ (3.95 , 4.15)	3.42_x000D_ (3.27 , 3.56)	0.99	1.56	0.6	17.55	27.16	10.66	0.31	0.69	0.17	6.63	13.49	3.42	1661.99	2584.17	1009.59	35358.9	54880.7	21307.9	258.88	533.5	133.5	6764.5	13617.1	3365.06
Iran (Islamic Republic of)	North Africa and Middle East	North Africa and Middle East	0.67	Middle SDI	2.63_x000D_ (1.71 , 3.56)	2.78_x000D_ (1.92 , 3.64)	0.22	0.37	0.14	4.63	7.04	3.24	0.11	0.22	0.06	2.04	4.23	1.35	138.8	232.03	90.38	3325.99	4908.27	2337.61	19.35	42.36	11.9	513.81	1041.4	341.04
Iraq	North Africa and Middle East	North Africa and Middle East	0.671	Middle SDI	-0.16_x000D_ (-0.51 , 0.19)	-0.52_x000D_ (-0.87 , -0.16)	1.76	2.91	1	31.19	53.4	16.91	1.86	3.17	1.01	36.28	62.48	19.15	313.3	531	172.18	6449.34	11249.8	3341.02	127.69	218.33	68.25	2705.35	4626.35	1443.77
Ireland	Western Europe	High income	0.867	High SDI	-1.98_x000D_ (-2.3 , -1.66)	-2.3_x000D_ (-2.64 , -1.96)	5.68	7.85	3.76	96.71	134.34	63.46	9.51	12.65	6.63	185.72	252.22	128.31	447.32	618	296.89	7490.41	10391	4936.06	416.27	551.66	288.57	8014.87	10801.7	5523.12
Israel	Western Europe	High income	0.803	High-middle SDI	-0.74_x000D_ (-2.03 , 0.57)	-1.04_x000D_ (-2.36 , 0.29)	2.77	3.87	1.78	49.71	70.42	32.2	3.49	4.65	2.47	67.72	91.04	47.89	333.77	467.6	214.83	5774.5	8175.19	3739.87	171.32	228.32	121.41	3314.24	4452.67	2347.12
Italy	Western Europe	High income	0.801	High-middle SDI	-1.21_x000D_ (-1.36 , -1.07)	-1.77_x000D_ (-1.89 , -1.66)	8.92	11.02	6.7	158.76	199.4	118.17	12.56	15.52	9.46	265.63	331.84	197.84	14237.6	17551.7	10802.5	229815	285539	172136	11699.6	14411.8	8836.86	241771	301323	180459
Jamaica	Caribbean	Latin America and Caribbean	0.684	Middle SDI	0.96_x000D_ (-1.15 , 3.11)	0.97_x000D_ (-2.73 , 4.8)	1.22	1.96	0.71	23.89	39.07	13.26	1.08	1.49	0.73	21.12	28.94	14.29	35.8	57.29	20.75	697.38	1140.19	387.23	20.11	27.73	13.56	379.53	521.38	257.3
Japan	High-income Asia Pacific	High income	0.87	High SDI	0.7_x000D_ (0.44 , 0.96)	0.55_x000D_ (0.28 , 0.82)	4.54	5.99	3.16	72.14	96.2	50.64	3.7	4.83	2.61	61.15	80.35	43.04	20699.2	27331.9	14290.1	286836	380823	199252	6094.65	8003.47	4277.13	104495	137484	73612.8
Jordan	North Africa and Middle East	North Africa and Middle East	0.731	High-middle SDI	-0.48_x000D_ (-1.32 , 0.38)	-0.99_x000D_ (-1.52 , -0.44)	1.52	2.43	0.85	24.38	40.23	13.32	1.75	2.71	1.08	32.83	51.65	19.9	69.86	114.42	38.51	1324.09	2150.97	714.3	17.74	27.69	10.76	389.69	626.41	230.58
Kazakhstan	Central Asia	Central Europe, eastern Europe, and central Asia	0.723	High-middle SDI	-1.88_x000D_ (-2.63 , -1.12)	-2.41_x000D_ (-3.44 , -1.36)	1.87	2.87	1.15	41.53	63.95	25.84	3.36	5.47	2.03	84.22	143.01	50.11	312.02	481.53	193.18	7373.71	11653.3	4603.1	426.82	691.37	256.56	11215.3	19614.8	6613.55
Kenya	Eastern Sub-Saharan Africa	Sub-Saharan Africa	0.508	Low-middle SDI	1.57_x000D_ (1.52 , 1.62)	1.41_x000D_ (1.32 , 1.5)	0.84	2.27	0.4	16.65	45.8	8.4	0.53	1.87	0.22	10.99	37.91	4.59	150.99	415.67	74.72	3516.1	9766.54	1771.66	38.43	133.73	15.82	902.69	3065.6	367.81
Kiribati	Oceania	Southeast Asia, east Asia, and Oceania	0.527	Low-middle SDI	-0.1_x000D_ (-0.46 , 0.25)	-0.41_x000D_ (-0.86 , 0.05)	0.97	1.44	0.64	19.37	30.09	11.86	1	1.48	0.66	21.65	32.59	13.91	0.5	0.79	0.3	13.5	21.21	8.01	0.31	0.48	0.19	8.28	12.68	5.26
Kuwait	North Africa and Middle East	North Africa and Middle East	0.851	High SDI	5.44_x000D_ (1.86 , 9.13)	4.89_x000D_ (1.27 , 8.63)	1.6	2.43	0.93	23.89	36.71	14.14	0.49	0.72	0.31	8.65	12.44	5.61	27.91	42.18	16.65	472.81	712.6	292.99	2.01	2.9	1.31	42.65	60.59	28.1
Kyrgyzstan	Central Asia	Central Europe, eastern Europe, and central Asia	0.596	Low-middle SDI	1.14_x000D_ (-0.13 , 2.43)	0.88_x000D_ (-0.37 , 2.15)	0.5	0.74	0.32	11.17	16.63	7.06	0.37	0.54	0.23	8.53	12.75	5.24	20.65	30.83	13.07	496.03	737.55	318.16	10.75	15.96	6.78	258.15	385.98	159.19
Lao People's Democratic Republic	Southeast Asia	Southeast Asia, east Asia, and Oceania	0.49	Low-middle SDI	1.02_x000D_ (0.94 , 1.1)	0.37_x000D_ (0.27 , 0.46)	0.81	1.36	0.43	15.64	27.21	8.39	0.6	1.19	0.28	14	28.66	6.11	29.27	50.82	15.59	671.89	1180.8	349.26	11.33	22.98	5.03	306.16	635.59	123.41
Latvia	Eastern Europe	Central Europe, eastern Europe, and central Asia	0.82	High SDI	-0.2_x000D_ (-1.32 , 0.94)	-0.27_x000D_ (-1.49 , 0.97)	1.79	2.85	1.05	38.29	62.24	22.13	1.61	2.24	1.07	37.51	52.87	24.82	74.97	119.55	44.18	1484.81	2394.61	863.01	59.25	82.77	39.43	1382.08	1939.3	910.58
Lebanon	North Africa and Middle East	North Africa and Middle East	0.708	High-middle SDI	1.14_x000D_ (0.85 , 1.43)	0.8_x000D_ (0.54 , 1.06)	0.27	0.96	0.08	4.57	16.17	1.19	0.19	0.66	0.06	3.61	12.44	1.17	13.72	49.15	3.63	236.74	842.24	60.71	3.64	12.84	1.17	78.72	272.29	23.98
Lesotho	Southern Sub-Saharan Africa	Sub-Saharan Africa	0.507	Low-middle SDI	1.62_x000D_ (1.42 , 1.82)	1.75_x000D_ (1.55 , 1.95)	7.91	12.25	4.19	187.36	302.35	90.18	4.97	7.5	2.86	113.29	173.75	63.19	95.66	153.08	47.45	2460.79	4026.25	1129.98	47.38	73.04	27.02	1142.35	1763.01	634.26
Liberia	Western Sub-Saharan Africa	Sub-Saharan Africa	0.37	Low SDI	-1.25_x000D_ (-1.62 , -0.88)	-1.42_x000D_ (-1.85 , -0.98)	0.31	0.72	0.13	6.28	14.69	2.57	0.44	1.04	0.2	9.47	22.3	3.95	5.31	12.35	2.18	127.14	295.64	48.76	4.89	11.54	2.14	110.86	258.6	45.6
Libya	North Africa and Middle East	North Africa and Middle East	0.709	High-middle SDI	3.33_x000D_ (2.76 , 3.9)	3.33_x000D_ (2.56 , 4.11)	0.43	1.75	0.12	7.97	33.3	2.15	0.17	0.76	0.04	3.18	15.11	0.67	18.64	75.69	5.25	383.09	1603.33	101.89	2.74	12.63	0.63	56.61	272.29	12.12
Lithuania	Eastern Europe	Central Europe, eastern Europe, and central Asia	0.843	High SDI	-1.72_x000D_ (-3.15 , -0.27)	-1.97_x000D_ (-3.44 , -0.47)	1.38	2.13	0.83	28.36	45.24	16.76	2.45	3.33	1.67	54.3	74.1	37.07	83.41	129.03	50.07	1599.61	2524.5	945.78	111.57	152.28	76.07	2474.47	3382.45	1681.84
Luxembourg	Western Europe	High income	0.895	High SDI	-1.62_x000D_ (-2.17 , -1.08)	-1.99_x000D_ (-2.6 , -1.38)	7.95	10.68	5.52	143.7	196.72	98.21	12.64	16.13	9.18	254.08	331.26	179.52	81.93	109.23	57.1	1421.54	1934.27	973.72	71.83	91.29	52.39	1416.76	1841.47	1005.78
Madagascar	Eastern Sub-Saharan Africa	Sub-Saharan Africa	0.396	Low SDI	-0.1_x000D_ (-0.36 , 0.16)	-0.24_x000D_ (-0.48 , 0.01)	0.59	2	0.2	12.61	41.23	4.37	0.61	2.15	0.22	13.45	44.63	5.06	53.26	173.5	18.2	1422.14	4394.79	478.69	28.27	96.79	10.48	731.5	2299.72	270.41
Malawi	Eastern Sub-Saharan Africa	Sub-Saharan Africa	0.384	Low SDI	0.6_x000D_ (0.44 , 0.76)	0.39_x000D_ (0.18 , 0.59)	0.68	2.02	0.28	13.67	41.54	5.63	0.57	1.88	0.21	12.18	39.44	4.38	42.08	127.92	17.51	964.2	2918.26	380.34	19.04	62.09	6.89	478.6	1523.21	167.17
Malaysia	Southeast Asia	Southeast Asia, east Asia, and Oceania	0.737	High-middle SDI	2.59_x000D_ (-0.08 , 5.32)	1.95_x000D_ (-0.04 , 3.99)	0.79	1.28	0.43	12.5	20.58	6.69	0.41	0.63	0.25	7.13	10.99	4.4	165.97	273.49	89.05	2999.62	4999.61	1593.09	30.23	46.15	18.2	589.68	917.06	362.69
Maldives	Southeast Asia	Southeast Asia, east Asia, and Oceania	0.562	Low-middle SDI	-2.24_x000D_ (-2.56 , -1.91)	-2.82_x000D_ (-3.31 , -2.33)	1.49	2.21	0.93	22.31	32.6	14.4	2.82	4.57	1.61	50.43	85.06	27.57	3.73	5.49	2.38	69.01	100.51	44.93	1.66	2.85	0.9	43.41	79.14	22.37
Mali	Western Sub-Saharan Africa	Sub-Saharan Africa	0.263	Low SDI	-1.1_x000D_ (-1.4 , -0.79)	-1.33_x000D_ (-1.66 , -1)	0.22	0.53	0.1	4.87	11.44	2.08	0.3	0.61	0.14	7.26	14.57	3.12	17.11	41.2	7.32	440.6	990.49	181.04	11.81	23.68	5.27	321.39	636.01	129.06
Malta	Western Europe	High income	0.801	High-middle SDI	-0.84_x000D_ (-1.52 , -0.16)	-0.99_x000D_ (-1.59 , -0.38)	7.17	9.29	5.13	131.36	171.83	93.51	8.97	11.27	6.56	171.92	217.86	123.04	72.93	93.97	52.25	1287.07	1675.21	917.37	39.08	49.07	28.55	756.88	958.47	541.31
Marshall Islands	Oceania	Southeast Asia, east Asia, and Oceania	0.544	Low-middle SDI	0.24_x000D_ (-0.42 , 0.91)	0.26_x000D_ (-0.19 , 0.72)	3.77	6.92	1.79	75.63	140.64	33.41	3.3	6.01	1.48	71.96	131.78	30.97	1.02	1.91	0.43	25.65	48.34	10.8	0.49	0.89	0.21	11.67	21.36	5.01
Mauritania	Western Sub-Saharan Africa	Sub-Saharan Africa	0.496	Low-middle SDI	-1.94_x000D_ (-2.22 , -1.66)	-2.37_x000D_ (-2.69 , -2.05)	0.35	0.71	0.17	6.72	14.24	3.21	0.63	1.07	0.35	13.85	23.96	7.49	6.38	13.2	3.06	135.88	288.34	63.67	6.14	10.57	3.34	143.82	250.71	75.12
Mauritius	Southeast Asia	Southeast Asia, east Asia, and Oceania	0.705	High-middle SDI	-2.65_x000D_ (-4.83 , -0.42)	-2.84_x000D_ (-4.77 , -0.87)	0.25	0.4	0.14	4.22	6.88	2.2	0.56	0.81	0.35	10.33	14.89	6.66	3.88	6.24	2.15	70.1	115.25	35.93	3.57	5.19	2.28	71.46	103.16	46.03
Mexico	Central Latin America	Latin America and Caribbean	0.649	Middle SDI	-0.32_x000D_ (-1.28 , 0.65)	-0.29_x000D_ (-0.91 , 0.34)	1.17	1.54	0.84	22.74	29.65	16.57	1.26	1.64	0.93	24.38	31.13	18.3	1299.04	1703.75	939.28	26278.9	34172.4	19272.8	476.02	612.66	352.3	10082	12763.5	7597.1
Micronesia (Federated States of)	Oceania	Southeast Asia, east Asia, and Oceania	0.58	Low-middle SDI	0.85_x000D_ (0.69 , 1.01)	0.71_x000D_ (0.61 , 0.82)	3.93	7.22	1.78	81.73	160.3	34.44	3.06	5.31	1.63	66.41	116.92	33.82	2.33	4.68	0.97	57.89	117.61	22.98	1.32	2.35	0.68	32.41	58.01	15.84
Monaco	Western Europe	High income	0.902	High SDI	0.73_x000D_ (0.58 , 0.88)	0.41_x000D_ (0.27 , 0.54)	16.34	22.61	10.83	298.52	423.85	190.79	13.2	18.61	8.4	264.31	381.34	163.96	17.13	23.27	11.56	288.5	404.69	187.08	9.99	13.9	6.49	181.28	258.07	112.5
Mongolia	Central Asia	Central Europe, eastern Europe, and central Asia	0.606	Low-middle SDI	-0.78_x000D_ (-1.34 , -0.22)	-0.93_x000D_ (-1.48 , -0.38)	1.48	2.56	0.75	32.58	58.47	16.1	1.86	3.16	0.98	42.91	73.18	22.88	29.34	52.19	14.79	729.91	1335.39	360.29	19.16	32.76	10.16	455.87	791.6	242.71
Montenegro	Central Europe	Central Europe, eastern Europe, and central Asia	0.791	High-middle SDI	1.95_x000D_ (1.35 , 2.55)	1.84_x000D_ (1.32 , 2.37)	1.42	2.18	0.9	28.8	44.81	17.78	0.85	1.24	0.6	17.59	25.88	12.21	14.52	22.25	9.11	297.2	464.73	181.54	5.11	7.4	3.55	109.47	162.32	75.61
Morocco	North Africa and Middle East	North Africa and Middle East	0.548	Low-middle SDI	3.8_x000D_ (2.81 , 4.79)	3.17_x000D_ (2.53 , 3.83)	0.25	1.03	0.06	4.57	18.49	1.07	0.09	0.39	0.02	1.84	7.9	0.44	64.42	266.05	14.94	1365.64	5555.24	294.73	10.35	46.53	2.39	253.71	1059.44	54.45
Mozambique	Eastern Sub-Saharan Africa	Sub-Saharan Africa	0.307	Low SDI	1.37_x000D_ (1.19 , 1.55)	1.28_x000D_ (1.1 , 1.46)	1.06	2.78	0.5	21.16	57.36	10.03	0.72	2.01	0.28	14.73	41	5.74	95.33	260.2	44.7	2212.11	5977.56	1011.31	36.15	101.75	13.97	865.35	2394.83	325.71
Myanmar	Southeast Asia	Southeast Asia, east Asia, and Oceania	0.521	Low-middle SDI	1.22_x000D_ (1.16 , 1.29)	0.66_x000D_ (0.58 , 0.75)	1.13	1.83	0.64	22.35	37.09	12.39	0.79	1.4	0.41	18.44	33.28	9.26	457.63	748.24	257.06	10303.1	17192.6	5602.89	166.52	300.06	84.39	4506.33	8375.83	2145.48
Namibia	Southern Sub-Saharan Africa	Sub-Saharan Africa	0.612	Middle SDI	0.06_x000D_ (-0.24 , 0.36)	-0.12_x000D_ (-0.43 , 0.18)	3.96	5.58	2.3	81.96	120.04	46.04	3.96	5.41	2.37	86.46	119.68	49.03	50.63	72.19	28.97	1115.38	1657.63	626.94	27.58	37.87	16.16	635.79	883.69	359.63
Nauru	Oceania	Southeast Asia, east Asia, and Oceania	0.618	Middle SDI	0.32_x000D_ (0.17 , 0.48)	0.15_x000D_ (-0.11 , 0.41)	3.17	5.81	1.7	60.53	121.24	30.56	2.9	5.59	1.54	57.82	118.46	27.96	0.08	0.17	0.04	2.22	4.69	1.04	0.07	0.15	0.03	1.93	4.19	0.9
Nepal	South Asia	South Asia	0.422	Low SDI	2.47_x000D_ (2.34 , 2.6)	1.97_x000D_ (1.83 , 2.11)	0.81	1.24	0.46	14.62	22.41	8.36	0.4	0.77	0.21	8.35	15.35	4.32	154.87	236.61	89.34	3103.16	4812.94	1791.28	31.51	57.77	16.43	769.94	1414.41	387.59
Netherlands	Western Europe	High income	0.883	High SDI	-1.61_x000D_ (-1.98 , -1.23)	-2.01_x000D_ (-2.32 , -1.7)	13.96	16.99	10.88	250.34	307.76	191.96	21.63	26.02	16.74	446.14	541.84	342.33	5134.36	6219.33	4031.33	88808.1	108643	68367.6	4461.78	5352.53	3449.5	89555.4	108457	68969.3
New Zealand	Australasia	High income	0.84	High SDI	-1.49_x000D_ (-1.97 , -1.01)	-1.87_x000D_ (-2.4 , -1.34)	7.75	9.31	6.14	137.22	166.68	107.02	12.11	14.72	9.4	240.38	294.88	183.84	646.86	775.7	510.84	11127.1	13481.4	8687.21	496.65	603.49	385.8	9755.4	11936.4	7485.77
Nicaragua	Central Latin America	Latin America and Caribbean	0.517	Low-middle SDI	2.76_x000D_ (2.04 , 3.48)	2.51_x000D_ (1.37 , 3.67)	0.35	0.5	0.22	6.17	9.28	3.76	0.15	0.26	0.09	2.89	4.83	1.8	13.23	19.49	8.2	256.17	393.19	154.05	2	3.44	1.23	41.45	69.09	26.14
Niger	Western Sub-Saharan Africa	Sub-Saharan Africa	0.162	Low SDI	-1.02_x000D_ (-1.46 , -0.58)	-1.23_x000D_ (-1.65 , -0.81)	0.24	0.62	0.1	5.04	12.68	2.02	0.33	0.82	0.13	7.28	18.2	2.72	16.01	41.43	6.32	394.82	960.61	153.44	8.06	20.08	2.99	211.51	497.42	73.62
Nigeria	Western Sub-Saharan Africa	Sub-Saharan Africa	0.515	Low-middle SDI	-0.41_x000D_ (-0.63 , -0.19)	-0.71_x000D_ (-0.89 , -0.53)	0.22	0.54	0.12	4.28	10.3	2.17	0.25	0.59	0.12	5.28	12.55	2.54	153.68	368.86	78.36	3520.62	8280.02	1727.13	98.78	238.47	46.88	2337.04	5534.76	1101.36
Niue	Oceania	Southeast Asia, east Asia, and Oceania	0.711	High-middle SDI	0.6_x000D_ (0.43 , 0.78)	0.39_x000D_ (0.21 , 0.56)	1.96	3.5	1.04	38.31	69.53	19.55	1.64	2.85	0.93	34.27	59.61	19.17	0.04	0.07	0.02	0.83	1.51	0.42	0.04	0.06	0.02	0.72	1.24	0.4
North Macedonia	Central Europe	Central Europe, eastern Europe, and central Asia	0.744	High-middle SDI	-0.37_x000D_ (-1.32 , 0.58)	-0.88_x000D_ (-1.89 , 0.14)	0.42	0.81	0.19	8.38	17.71	3.43	0.48	0.74	0.28	11.02	17.2	6.4	13.08	27.13	5.86	276.74	597.78	109.9	8.82	13.9	5.2	218.94	343.43	124.52
Northern Mariana Islands	Oceania	Southeast Asia, east Asia, and Oceania	0.771	High-middle SDI	-0.5_x000D_ (-1.09 , 0.09)	-0.72_x000D_ (-1.48 , 0.05)	2.08	3.14	1.31	33.95	53.18	20.14	2.36	3.61	1.49	40.74	63.75	24.74	0.77	1.2	0.45	16.32	26.39	9.15	0.22	0.36	0.13	5.4	8.86	3.17
Norway	Western Europe	High income	0.913	High SDI	-0.53_x000D_ (-0.79 , -0.27)	-1.22_x000D_ (-1.73 , -0.72)	7.15	9.22	5.45	125.31	162.96	94.8	8.24	9.96	5.94	172.84	211.01	117.52	733.36	949.22	555.22	12344	16063.2	9362.33	593.3	715.3	440.13	11506.7	13982.2	8191.97
Oman	North Africa and Middle East	North Africa and Middle East	0.783	High-middle SDI	1.6_x000D_ (1.17 , 2.02)	1.26_x000D_ (0.68 , 1.85)	2.13	3.03	1.36	40.09	57.89	24.74	1.35	2.41	0.73	28.9	53.43	15.28	25.71	37.45	15.42	636.88	941.86	350.93	7.55	13.97	4.01	186.11	338.5	96.9
Pakistan	South Asia	South Asia	0.449	Low SDI	2.43_x000D_ (2.3 , 2.57)	2.36_x000D_ (2.22 , 2.49)	0.93	1.77	0.49	18.03	35.32	9.04	0.46	1.39	0.2	9.18	27.82	3.79	829.2	1627.06	420.03	18650.7	36613.9	8961.84	239.01	724.92	102.4	5100.15	15287.7	2052.97
Palau	Oceania	Southeast Asia, east Asia, and Oceania	0.738	High-middle SDI	-0.19_x000D_ (-0.36 , -0.01)	-0.3_x000D_ (-0.5 , -0.09)	3.48	5.3	2.27	67.93	107.52	43.08	3.65	5.49	2.36	73.8	112.08	48.14	0.59	0.94	0.37	14.08	22.97	8.62	0.32	0.49	0.21	7.45	11.42	4.83
Palestine	North Africa and Middle East	North Africa and Middle East	0.588	Low-middle SDI	-1.75_x000D_ (-2.28 , -1.23)	-1.97_x000D_ (-2.46 , -1.49)	0.26	0.44	0.14	4.83	7.98	2.45	0.43	0.79	0.19	8.52	15.81	3.59	4.87	8.07	2.49	106.63	179.18	50.97	3.35	6.15	1.41	71.47	132.63	29.76
Panama	Central Latin America	Latin America and Caribbean	0.686	Middle SDI	-0.13_x000D_ (-3 , 2.82)	-0.21_x000D_ (-2.53 , 2.15)	0.41	0.67	0.22	6.66	11.17	3.46	0.42	0.58	0.29	7.46	10.2	5.21	16.89	27.47	9	274.08	457.82	142.68	5.82	8.06	3.99	108.09	147.05	76.1
Papua New Guinea	Oceania	Southeast Asia, east Asia, and Oceania	0.394	Low SDI	1.69_x000D_ (1.5 , 1.87)	1.59_x000D_ (1.39 , 1.78)	1.82	3.25	0.98	37.87	68.93	19.5	1.12	1.97	0.62	24	42	13.17	68.46	125.73	35.2	1704.24	3136.63	853.51	17.95	31.98	9.69	455.59	804.49	245.8
Paraguay	Tropical Latin America	Latin America and Caribbean	0.638	Middle SDI	3.31_x000D_ (2.59 , 4.03)	3.31_x000D_ (2.87 , 3.74)	1.04	1.7	0.56	19.12	32.19	10	0.45	0.64	0.28	8.37	12.3	5.28	53.59	87.47	28.67	1035.01	1736.17	539.52	9.02	12.96	5.79	179.51	269.11	113.53
Peru	Andean Latin America	Latin America and Caribbean	0.648	Middle SDI	-4.45_x000D_ (-5.17 , -3.71)	-5_x000D_ (-6.32 , -3.67)	0.73	1.28	0.37	12.38	22.26	6.2	2.76	4.16	1.38	54.03	82.54	25.47	230.81	405.34	118.37	3910.31	7011.36	1962.55	298.92	453.27	147.51	6226.84	9550.6	2889.6
Philippines	Southeast Asia	Southeast Asia, east Asia, and Oceania	0.623	Middle SDI	-1.41_x000D_ (-1.89 , -0.93)	-1.42_x000D_ (-1.86 , -0.98)	0.5	0.79	0.32	10.62	16.88	6.66	0.79	1.14	0.53	16.69	24.16	10.98	345.07	549.28	216.78	8522.92	13451.1	5314.97	202.22	292.77	132.91	5221.6	7472.15	3396.04
Poland	Central Europe	Central Europe, eastern Europe, and central Asia	0.802	High-middle SDI	3.84_x000D_ (3.36 , 4.33)	3.47_x000D_ (2.95 , 3.98)	5.51	8.09	3.56	115.31	171.24	73.14	1.82	2.49	1.23	42.09	57.58	28.55	4043.96	5926.47	2600.07	83145.7	123056	52872.7	817.11	1115.53	549.73	19051.4	26108.6	12892.7
Portugal	Western Europe	High income	0.743	High-middle SDI	1.57_x000D_ (0.33 , 2.83)	1.58_x000D_ (0.25 , 2.92)	2.34	3.35	1.51	44.43	64.66	28.55	1.49	2.07	1.01	28.21	39.36	19.08	609.85	866.42	396.09	10475.9	15080.7	6743.34	215.9	299.58	145.47	4117.59	5757.89	2761.03
Puerto Rico	Caribbean	Latin America and Caribbean	0.814	High SDI	-1.97_x000D_ (-2.68 , -1.26)	-1.73_x000D_ (-2.61 , -0.84)	0.9	1.44	0.49	16.13	26.2	8.81	1.53	2.08	1.03	27.34	37.49	18.77	71.08	113.49	39.5	1139.52	1855.28	632.75	54.54	74.36	36.52	989.45	1363.25	675.02
Qatar	North Africa and Middle East	North Africa and Middle East	0.83	High SDI	4.32_x000D_ (1.36 , 7.36)	3.11_x000D_ (1.44 , 4.81)	0.77	1.51	0.38	12.28	22.5	5.63	0.25	0.57	0.12	4.63	10.94	2.02	3.19	6.07	1.33	83.27	161.68	32.07	0.15	0.37	0.06	3.77	9.66	1.41
Republic of Korea	High-income Asia Pacific	High income	0.878	High SDI	1.68_x000D_ (1.17 , 2.2)	0.68_x000D_ (0.13 , 1.23)	1.92	2.82	1.18	28.25	42.05	17.37	1.18	1.92	0.73	23.09	37.41	14.3	1669.99	2474.46	1025.05	25312	37837.6	15529.7	298.12	480.03	184.55	6617.42	10797.8	4116.63
Republic of Moldova	Eastern Europe	Central Europe, eastern Europe, and central Asia	0.696	High-middle SDI	-1.36_x000D_ (-6.31 , 3.85)	-1.43_x000D_ (-6.61 , 4.05)	0.41	0.6	0.26	10.91	16.18	6.93	0.62	0.89	0.41	17	24.46	11.18	24.17	35.53	15.4	637.09	944.62	399.36	28.74	41.58	18.99	806.39	1166.72	528.94
Romania	Central Europe	Central Europe, eastern Europe, and central Asia	0.76	High-middle SDI	2.01_x000D_ (1.31 , 2.71)	1.79_x000D_ (1.06 , 2.53)	1.51	2.38	0.89	35.66	57.45	20.76	0.93	1.27	0.66	23.1	31.8	15.89	564.64	887.14	336.98	12740	20387.1	7451.48	271.25	375.78	189.95	6883.46	9560.24	4719.33
Russian Federation	Eastern Europe	Central Europe, eastern Europe, and central Asia	0.805	High-middle SDI	0.59_x000D_ (-1.45 , 2.68)	0.3_x000D_ (-1.84 , 2.49)	1.82	2.55	1.19	40.09	56.54	25.87	1.75	2.37	1.22	41.68	56.95	29.01	4374.71	6166.78	2864.2	96290.1	136031	61845.8	3254.36	4418.77	2267.56	79284.6	108473	55176.7
Rwanda	Eastern Sub-Saharan Africa	Sub-Saharan Africa	0.429	Low SDI	-0.31_x000D_ (-0.5 , -0.11)	-0.75_x000D_ (-1.07 , -0.43)	1.05	3.03	0.42	20.29	59.41	8.3	1.14	2.76	0.57	25.14	60.44	12.22	50.84	149.74	20.68	1153.84	3381.36	461.78	29.6	71.43	14.48	746.06	1766.13	354.84
Saint Kitts and Nevis	Caribbean	Latin America and Caribbean	0.746	High-middle SDI	-0.76_x000D_ (-1.78 , 0.27)	-0.47_x000D_ (-1.58 , 0.66)	2.64	3.48	1.91	55.67	76.03	39.18	3.17	4.01	2.32	65.28	83.4	48.37	1.58	2.14	1.13	37.75	52.62	26.15	1.2	1.54	0.86	23.91	30.67	17.44
Saint Lucia	Caribbean	Latin America and Caribbean	0.67	Middle SDI	-1.81_x000D_ (-2.7 , -0.9)	-1.81_x000D_ (-2.63 , -0.99)	0.67	0.94	0.45	12.81	18.4	8.4	1.18	1.54	0.84	22.7	29.77	16.74	1.39	1.97	0.93	27.93	40.33	18.32	0.95	1.26	0.69	19.46	25.52	14.29
Saint Vincent and the Grenadines	Caribbean	Latin America and Caribbean	0.627	Middle SDI	0.71_x000D_ (0.27 , 1.14)	0.68_x000D_ (0.24 , 1.12)	0.75	1.05	0.53	14.66	20.4	10.32	0.65	0.87	0.46	12.84	16.72	9.37	0.97	1.36	0.68	19.91	27.71	14.04	0.46	0.61	0.32	9.11	11.94	6.63
Samoa	Oceania	Southeast Asia, east Asia, and Oceania	0.641	Middle SDI	-0.51_x000D_ (-0.8 , -0.23)	-0.73_x000D_ (-0.96 , -0.49)	0.93	1.39	0.58	19.26	29.83	11.72	1.08	1.6	0.67	23.66	35.92	14.09	1.2	1.84	0.74	27.08	43.18	16.17	0.89	1.34	0.54	21.11	32.47	12.33
San Marino	Western Europe	High income	0.884	High SDI	0.01_x000D_ (-0.07 , 0.09)	-0.18_x000D_ (-0.23 , -0.12)	9.13	15.25	4.78	157.83	276.29	78.64	9.1	13.21	5.93	166.52	250.14	104.97	6.47	10.58	3.43	102.79	176.13	52.41	3.18	4.61	2.08	57.93	86.49	36.71
Sao Tome and Principe	Western Sub-Saharan Africa	Sub-Saharan Africa	0.502	Low SDI	1.56_x000D_ (1.13 , 2)	1.4_x000D_ (1.01 , 1.79)	0.56	1.24	0.29	11.18	24.84	5.58	0.36	1.06	0.15	7.51	21.72	3.03	0.5	1.1	0.25	11.18	24.15	5.37	0.21	0.65	0.09	4.85	14.31	1.93
Saudi Arabia	North Africa and Middle East	North Africa and Middle East	0.805	High-middle SDI	2.6_x000D_ (2.34 , 2.86)	2.66_x000D_ (2.43 , 2.9)	0.14	0.22	0.08	2.81	4.76	1.54	0.06	0.14	0.03	1.29	2.75	0.47	18.96	33.31	9.52	529.88	984.52	232.49	3.13	6.66	1.13	78.58	175.45	24.44
Senegal	Western Sub-Saharan Africa	Sub-Saharan Africa	0.389	Low SDI	-0.23_x000D_ (-1.16 , 0.7)	-0.57_x000D_ (-1.1 , -0.04)	0.64	1.15	0.33	12.77	23.64	6.44	0.67	1.21	0.3	14.11	26.05	6.1	42.28	77.37	21.71	925.32	1704.72	456.98	19.98	36.8	8.61	455.93	846.26	194.57
Serbia	Central Europe	Central Europe, eastern Europe, and central Asia	0.767	High-middle SDI	1.77_x000D_ (0.99 , 2.56)	1.59_x000D_ (0.86 , 2.31)	2.62	4.36	1.41	60.45	102.35	31.55	1.59	2.62	0.95	38.8	63.26	23.29	447.03	740.09	241.32	10005.7	16874.9	5298.37	192.68	316.83	114.09	4904.87	8053.64	2893.42
Seychelles	Southeast Asia	Southeast Asia, east Asia, and Oceania	0.724	High-middle SDI	-1.28_x000D_ (-1.91 , -0.65)	-1.63_x000D_ (-2.14 , -1.11)	0.81	1.41	0.48	15.73	27.49	9.41	1.19	1.98	0.61	25.42	43.39	12.76	0.81	1.43	0.48	17.56	31.06	10.43	0.66	1.11	0.34	14.14	24	7.09
Sierra Leone	Western Sub-Saharan Africa	Sub-Saharan Africa	0.347	Low SDI	-0.56_x000D_ (-0.91 , -0.22)	-0.6_x000D_ (-0.86 , -0.33)	0.35	0.82	0.15	7.29	17.07	3	0.41	1.02	0.18	8.73	21.36	3.62	11.17	25.53	4.63	263.66	588.12	106.95	7.73	19.06	3.3	171.99	417.49	69.85
Singapore	High-income Asia Pacific	High income	0.861	High SDI	-2.98_x000D_ (-3.79 , -2.16)	-3.39_x000D_ (-4.05 , -2.74)	3.24	4.64	2.1	49.54	71.12	31.94	7.81	10.64	5.41	136.78	192.84	92.35	228.61	328.59	148	3632	5221.74	2323.82	144.89	200.97	99.52	2754.33	4009.3	1817.37
Slovakia	Central Europe	Central Europe, eastern Europe, and central Asia	0.812	High SDI	-1.71_x000D_ (-2.3 , -1.11)	-2.1_x000D_ (-2.74 , -1.45)	1.39	2.33	0.75	29.72	51.12	15.6	2.24	3.23	1.41	53.72	77.61	33.75	134.79	226.22	73.46	2875.29	4975.48	1516.59	138.27	201.49	87.21	3303.89	4812.54	2083.67
Slovenia	Central Europe	Central Europe, eastern Europe, and central Asia	0.84	High SDI	1.5_x000D_ (0.11 , 2.9)	1.08_x000D_ (-0.39 , 2.58)	6.85	10.54	4.07	141.62	226.7	81.63	4.67	7.6	2.59	106.77	175.63	58.08	305.91	468.53	183.26	5983.61	9472.57	3474.77	117.27	190.38	65.41	2683.73	4411.34	1458.35
Solomon Islands	Oceania	Southeast Asia, east Asia, and Oceania	0.407	Low SDI	0.89_x000D_ (0.72 , 1.05)	0.71_x000D_ (0.36 , 1.06)	3.06	5.42	1.51	66.34	128.58	31.04	2.36	4.35	1.17	53.77	105	24.87	7.6	14.89	3.48	202.65	419.65	88.34	2.9	5.67	1.32	77.02	153.94	34.55
Somalia	Eastern Sub-Saharan Africa	Sub-Saharan Africa	0.081	Low SDI	-0.39_x000D_ (-0.5 , -0.27)	-0.48_x000D_ (-0.61 , -0.36)	0.69	1.92	0.23	15.19	41.51	5.24	0.77	2.37	0.28	17.56	52.08	6.36	38.46	105.63	12.92	1027.12	2719.83	343.43	16.67	49.24	5.94	462.49	1302.65	162.33
South Africa	Southern Sub-Saharan Africa	Sub-Saharan Africa	0.678	Middle SDI	-0.3_x000D_ (-1.2 , 0.6)	-0.52_x000D_ (-1.46 , 0.43)	4.81	6.2	3.51	96.13	126.63	70.43	5.22	7.61	3.51	113.35	164.78	76.76	1946.38	2527	1413.95	41961.4	55300.1	30814.6	1010.7	1474.59	678.11	23445.4	33880.5	15924.9
South Sudan	Eastern Sub-Saharan Africa	Sub-Saharan Africa	0.363	Low SDI	-0.15_x000D_ (-0.26 , -0.03)	-0.4_x000D_ (-0.54 , -0.26)	0.62	2.6	0.23	12.1	50.44	4.38	0.65	2.69	0.23	13.63	57.67	4.54	19.16	80.91	6.86	435.23	1731.13	151.65	13.9	58.96	4.75	323.75	1352.92	104.2
Spain	Western Europe	High income	0.767	High-middle SDI	-0.07_x000D_ (-0.45 , 0.32)	-0.52_x000D_ (-0.84 , -0.21)	5.31	7.24	3.53	97.82	134.48	65.15	5.51	7.42	3.8	112.55	152.88	76.81	5449.84	7362.6	3640.19	91636.8	126135	60884.6	3152.92	4238.8	2169.97	63403.1	86161.2	43150.2
Sri Lanka	Southeast Asia	Southeast Asia, east Asia, and Oceania	0.69	High-middle SDI	0.12_x000D_ (-0.61 , 0.86)	-0.25_x000D_ (-0.99 , 0.49)	0.67	1.15	0.37	13.68	24.1	7.5	0.7	0.96	0.5	15.35	21.1	10.82	155	271.9	85.18	3457.92	6158.78	1841.85	66.82	91.18	47.1	1741.04	2462.69	1220.28
Sudan	North Africa and Middle East	North Africa and Middle East	0.515	Low-middle SDI	2.16_x000D_ (2.08 , 2.24)	1.54_x000D_ (1.47 , 1.61)	0.13	0.47	0.04	2.56	8.89	0.73	0.07	0.32	0.02	1.64	6.47	0.45	20.64	72.39	5.76	474.14	1568.02	137.98	6.08	26.44	1.64	161.65	587.45	43.21
Suriname	Caribbean	Latin America and Caribbean	0.636	Middle SDI	0.34_x000D_ (-0.27 , 0.96)	0.54_x000D_ (-0.23 , 1.31)	0.83	1.22	0.54	17.03	24.58	10.99	0.76	1.02	0.54	15.49	20.55	11	4.74	6.92	3.09	103.47	150.56	66	1.86	2.49	1.32	41.28	54.96	29.57
Sweden	Western Europe	High income	0.872	High SDI	-0.54_x000D_ (-0.81 , -0.27)	-1.12_x000D_ (-1.4 , -0.84)	4.85	6.05	3.69	81.95	102.83	61.8	5.66	6.99	4.28	111.78	138.61	84.08	1164.76	1444.24	881.33	18478.5	23069.9	13943.4	919.53	1132.83	692.66	16926.5	20957.6	12729.3
Switzerland	Western Europe	High income	0.929	High SDI	-1.77_x000D_ (-1.98 , -1.55)	-2.18_x000D_ (-2.58 , -1.79)	7.26	9.01	5.45	133.11	167.54	98.38	11.84	14.74	8.89	245.52	309.49	181.37	1343.25	1657.87	1019.86	22983.8	28760.5	17054	1268.91	1566.03	952.04	24964.5	31332.3	18599.4
Syrian Arab Republic	North Africa and Middle East	North Africa and Middle East	0.619	Middle SDI	2.33_x000D_ (1.91 , 2.75)	1.93_x000D_ (1.51 , 2.36)	0.2	0.37	0.11	3.61	6.87	1.74	0.1	0.2	0.04	2	4.05	0.71	19.49	36.88	9.62	424.16	839.46	189.3	4.38	8.82	1.59	103.54	218.34	36.77
Taiwan (Province of China)	East Asia	Southeast Asia, east Asia, and Oceania	0.868	High SDI	1.59_x000D_ (0.88 , 2.3)	0.91_x000D_ (0.11 , 1.72)	1.41	2.43	0.73	24.79	44.01	12.45	0.97	1.68	0.57	20.56	42.03	10.96	559.52	963.98	291.52	9823.78	17181.7	4957.1	144.73	271.32	80.42	3459.33	8046.48	1704.47
Tajikistan	Central Asia	Central Europe, eastern Europe, and central Asia	0.539	Low-middle SDI	0.76_x000D_ (0.24 , 1.3)	0.2_x000D_ (-0.32 , 0.72)	0.48	0.81	0.29	11.82	18.58	7.21	0.39	0.67	0.25	11.14	18.1	7.03	22.73	36.05	13.79	715.15	1146.18	417.67	11.59	19.28	7.27	357.83	586.44	216.78
Thailand	Southeast Asia	Southeast Asia, east Asia, and Oceania	0.687	Middle SDI	-1.62_x000D_ (-2.54 , -0.7)	-2.45_x000D_ (-3.34 , -1.55)	1.02	1.8	0.52	18.83	32.37	9.43	1.64	2.59	1.01	38.35	58.73	23.5	992.08	1760.6	497.6	18640.6	32457.6	9197.46	547.59	854.98	340.19	15553.6	23374.2	9463.51
Timor-Leste	Southeast Asia	Southeast Asia, east Asia, and Oceania	0.514	Low-middle SDI	4.43_x000D_ (4.2 , 4.66)	3.91_x000D_ (3.5 , 4.31)	0.81	1.39	0.4	14.61	25.63	6.86	0.23	0.67	0.09	4.84	13.51	1.76	5.26	9.03	2.51	107.82	189.1	48.79	0.52	1.48	0.19	14.77	38.81	4.28
Togo	Western Sub-Saharan Africa	Sub-Saharan Africa	0.417	Low SDI	-0.49_x000D_ (-0.66 , -0.32)	-0.55_x000D_ (-0.72 , -0.37)	0.49	0.87	0.25	10.33	19.02	5.16	0.56	1.09	0.27	12.07	23.81	5.75	15.02	27.73	7.46	372.85	708.26	181.36	6.12	12.09	2.91	151.39	291.53	69.12
Tokelau	Oceania	Southeast Asia, east Asia, and Oceania	0.626	Middle SDI	0.4_x000D_ (0.11 , 0.69)	0.24_x000D_ (-0.12 , 0.6)	1.53	2.59	0.87	28.21	48.59	15.13	1.36	2.09	0.83	26.55	41.53	15.68	0.02	0.03	0.01	0.38	0.65	0.2	0.02	0.03	0.01	0.37	0.59	0.21
Tonga	Oceania	Southeast Asia, east Asia, and Oceania	0.636	Middle SDI	0.59_x000D_ (0.13 , 1.05)	0.71_x000D_ (0.23 , 1.19)	1.95	3.07	1.13	37.4	61.13	20.95	1.67	2.75	0.95	30.98	52.38	17.15	1.46	2.31	0.84	28.37	46.67	15.9	0.79	1.33	0.44	16.55	28.06	9.1
Trinidad and Tobago	Caribbean	Latin America and Caribbean	0.757	High-middle SDI	-1.64_x000D_ (-5.41 , 2.28)	-1.53_x000D_ (-5.29 , 2.37)	0.51	0.85	0.27	10.53	18.07	5.6	0.72	1.01	0.49	14.53	19.95	9.96	9.28	15.56	4.94	195.49	336.5	102.8	5.98	8.27	4.03	123.65	169.9	85.04
Tunisia	North Africa and Middle East	North Africa and Middle East	0.672	Middle SDI	2.69_x000D_ (2.35 , 3.04)	2.34_x000D_ (2.06 , 2.62)	0.25	1.07	0.05	3.91	18.07	0.77	0.12	0.62	0.03	1.99	11.46	0.45	27.4	120.52	5.54	463.01	2192.94	86.69	4.5	26.73	0.91	92.35	545.85	19.81
Turkey	North Africa and Middle East	North Africa and Middle East	0.748	High-middle SDI	-0.97_x000D_ (-1.48 , -0.46)	-1.3_x000D_ (-1.71 , -0.89)	7.2	10.94	4.19	152.71	236.84	88.83	9.53	13.56	6.01	220.27	324.41	134.73	6197.68	9476.74	3612.03	135857	211873	78095.5	3241.7	4715.99	2011.33	80528.6	122345	48674.3
Turkmenistan	Central Asia	Central Europe, eastern Europe, and central Asia	0.67	Middle SDI	1.01_x000D_ (0.1 , 1.92)	0.99_x000D_ (0.1 , 1.9)	0.53	1.25	0.22	15.26	45.18	5.31	0.41	0.94	0.2	11.74	35.35	4.91	21.18	58.12	8.15	687.25	2254.61	221.22	8.34	24.33	3.78	273.67	1019.49	98.21
Tuvalu	Oceania	Southeast Asia, east Asia, and Oceania	0.589	Low-middle SDI	0.29_x000D_ (0.15 , 0.43)	-0.15_x000D_ (-0.29 , 0)	2.18	3.89	1.21	42.28	78.28	22.18	2.01	3.37	1.16	44.25	75.13	24.87	0.2	0.36	0.1	4.33	8.2	2.21	0.14	0.24	0.08	3.31	5.8	1.84
Uganda	Eastern Sub-Saharan Africa	Sub-Saharan Africa	0.404	Low SDI	0.95_x000D_ (0.79 , 1.11)	0.71_x000D_ (0.49 , 0.93)	0.79	2.21	0.31	15.48	44.94	6.15	0.6	2.04	0.19	12.49	42.89	3.78	91.55	261.17	36.13	2082.46	6163.69	786.01	34.21	116.78	10.59	809.38	2786.02	238.7
Ukraine	Eastern Europe	Central Europe, eastern Europe, and central Asia	0.736	High-middle SDI	-0.22_x000D_ (-1.93 , 1.52)	-0.86_x000D_ (-2.66 , 0.97)	1.99	2.97	1.23	52.06	79.34	31.48	2.22	3.8	1.32	56.6	107.54	31.58	1519.2	2299.22	951.6	38252.4	58128.2	23414.6	1635.31	2723.46	964.03	41215.5	72759.8	23624.7
United Arab Emirates	North Africa and Middle East	North Africa and Middle East	0.88	High SDI	1.31_x000D_ (0.69 , 1.93)	1.38_x000D_ (0.47 , 2.3)	0.33	1.29	0.07	5.78	23.28	1.19	0.21	1.04	0.05	3.88	19.67	1.03	7.08	28.86	1.38	238.06	971.08	51.38	0.56	2.8	0.16	16.91	79.57	5.24
United Kingdom	Western Europe	High income	0.847	High SDI	-1.24_x000D_ (-1.39 , -1.09)	-1.7_x000D_ (-1.92 , -1.49)	13.23	15.47	10.74	231.17	272.33	188.14	18.9	22.32	15.02	382.88	454.89	300.02	18217.5	21274.5	14788.6	300365	352100	245256	18229.9	21467.1	14504.5	354496	419659	279701
United Republic of Tanzania	Eastern Sub-Saharan Africa	Sub-Saharan Africa	0.423	Low SDI	0.57_x000D_ (0.35 , 0.79)	0.38_x000D_ (0.2 , 0.56)	0.94	3.3	0.32	18.4	63.74	6.44	0.8	2.98	0.3	16.53	63.02	6.2	196.2	691.03	68.11	4330.32	14991.9	1502.87	76.62	292.59	28.56	1798.32	6862.8	664.48
United States of America	High-income North America	High income	0.859	High SDI	-1.25_x000D_ (-1.47 , -1.04)	-1.82_x000D_ (-2.03 , -1.62)	6.86	8.72	5.15	110.99	143.44	82.46	9.94	12.54	7.26	191.43	245.33	138.41	40764.1	51859.3	30522.8	648876	839443	481957	33926.7	42661.4	24871.5	634601	808199	459980
United States Virgin Islands	Caribbean	Latin America and Caribbean	0.799	High-middle SDI	1.98_x000D_ (1.3 , 2.67)	2.06_x000D_ (1.32 , 2.79)	4.67	6.51	3.13	96.12	138.9	62.27	2.69	3.76	1.78	54.46	76.94	35.73	8.73	12.38	5.76	180.47	261.09	117.65	2.04	2.89	1.31	46.87	66.63	31.2
Uruguay	Southern Latin America	Latin America and Caribbean	0.697	High-middle SDI	-0.04_x000D_ (-1.55 , 1.49)	-0.36_x000D_ (-0.69 , -0.04)	3.06	4.44	1.93	58.75	85.75	36.73	3.36	4.71	2.17	67.93	96.87	43.61	177.46	254.38	112.31	3143.48	4583.5	1967.57	134.15	187.89	86.76	2684.7	3801.39	1721.65
Uzbekistan	Central Asia	Central Europe, eastern Europe, and central Asia	0.631	Middle SDI	0.86_x000D_ (-1.79 , 3.57)	0.17_x000D_ (-2.49 , 2.9)	0.44	0.65	0.29	9.28	14.04	5.98	0.36	0.5	0.23	9.01	12.55	5.9	75.39	114.99	47.87	1955.29	3062.53	1227.26	39.58	55.44	25.59	1046.23	1459.89	685.98
Vanuatu	Oceania	Southeast Asia, east Asia, and Oceania	0.485	Low-middle SDI	1.7_x000D_ (1.37 , 2.03)	1.71_x000D_ (1.27 , 2.14)	3.21	5.67	1.23	65.5	120.76	21.97	1.97	3.86	0.91	39.7	79.56	17.46	4.73	8.71	1.59	111.44	210.86	35.39	1.06	2.13	0.46	25.16	50.4	10.75
Venezuela (Bolivarian Republic of)	Central Latin America	Latin America and Caribbean	0.607	Low-middle SDI	0.19_x000D_ (-1.58 , 2)	-0.01_x000D_ (-1.86 , 1.88)	0.62	1.04	0.33	12.34	21.34	6.17	0.57	0.78	0.4	11.93	16.36	8.4	171.57	291.97	88.63	3578.38	6238.03	1780.61	50.34	68.85	35.15	1118.62	1520.86	789.99
Viet Nam	Southeast Asia	Southeast Asia, east Asia, and Oceania	0.617	Middle SDI	1.91_x000D_ (1.76 , 2.07)	1.66_x000D_ (1.44 , 1.87)	1.38	2.3	0.8	28.6	48.56	16.02	0.8	1.33	0.45	17.74	30.01	9.7	1199.46	2043.55	684.03	27820.4	48189.5	14905.3	306.71	516.11	168.57	7232.36	12337.9	3919.17
Yemen	North Africa and Middle East	North Africa and Middle East	0.412	Low SDI	2.95_x000D_ (2.78 , 3.12)	2.41_x000D_ (2.24 , 2.58)	0.17	0.61	0.05	3.42	12.13	1.03	0.07	0.27	0.02	1.74	6.07	0.41	18.49	67.53	5.35	452.93	1551.38	128.37	3.27	11.96	0.73	91.99	300.59	19.82
Zambia	Eastern Sub-Saharan Africa	Sub-Saharan Africa	0.505	Low-middle SDI	1.03_x000D_ (0.77 , 1.28)	0.88_x000D_ (0.61 , 1.16)	1.24	3.33	0.56	24.95	67.79	11.32	0.93	3.41	0.39	19.46	69.28	7.87	67.81	183.56	30.5	1600.1	4385.38	700.14	22.59	82.16	9.11	556.19	1887.44	215.3
Zimbabwe	Southern Sub-Saharan Africa	Sub-Saharan Africa	0.476	Low-middle SDI	1.8_x000D_ (1.51 , 2.1)	2.05_x000D_ (1.72 , 2.38)	1.28	2.04	0.76	24.84	39.75	14.5	0.77	1.52	0.45	14.12	29.76	8.09	72.35	116.73	42.38	1597.04	2555.85	921.8	24.97	52.28	14.26	521.76	1164.12	294.18
ASMR, age-standardized mortality rate; DALYs, disability-adjusted life years; ASDR, age-standardized disability-adjusted life year rate; AAPC, average annual percentage change; CI, confidence interval.
